# Supplementary material
Source: PubMed Central journal article supplement (PMC5831461)
Supplement: jamasurg-152-406-s002.pdf [file jamasurg-152-406-s002.pdf]

## Supplementary Online Content

Deiner S, Luo X, Lin HM, et al; Dexlirium Writing Group. Intraoperative infusion of dexmedetomidine for prevention of postoperative delirium and cognitive dysfunction in elderly patients undergoing major elective noncardiac surgery: a randomized clinical trial. *JAMA Surg*. Published online June 7, 2017.  
doi:10.1001/jamasurg.2017.1505

**eFigure.** Plot of Unadjusted z Scores Over Time

This supplementary material has been provided by the authors to give readers additional information about their work.

**eFigure.** Plot of Unadjusted z Scores Over Time

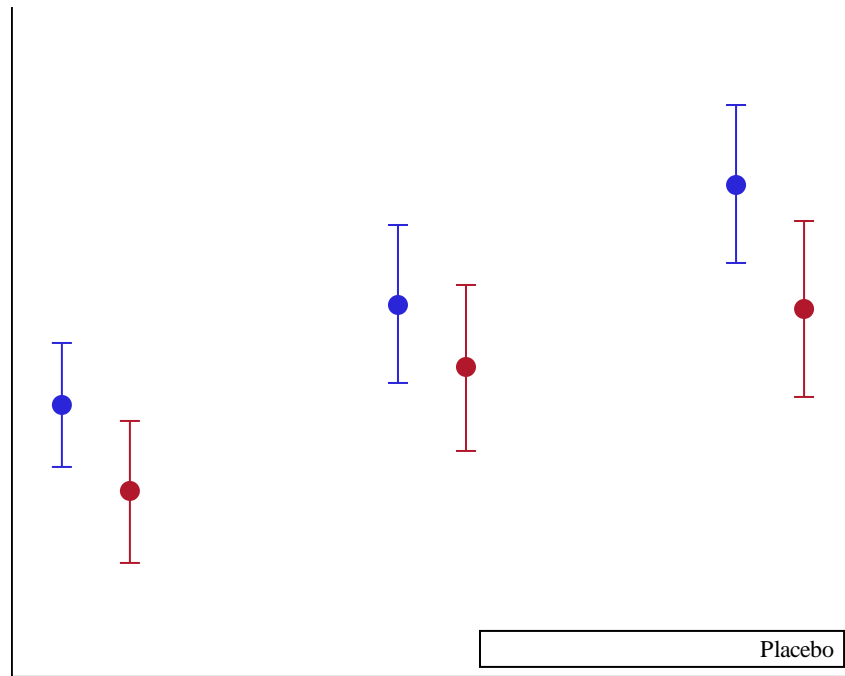

Plot of unadjusted composite z-scores at baseline , 3 months after, and 6 months after surgery
